# Supplementary material for: Probiotic Evaluation of Lactiplantibacillus pentosus 68-1, a Rutin Conversion Strain Isolated from Jiangshui, by Genomic Analysis and Tests In Vitro
Source: MDPI journal article supplement (doi:10.3390/fermentation10020087), 2024-01-31
Supplement: s1 [file s1]

**Table S1.** Genome information of the selected strains of *Lactiplantibacillus pentosus*.

**Table S2.** EggNOG category distribution of functional annotation results of *Lactiplantibacillus pentosus* 68-1 chromosome.

**Table S3.** Relatedness of the sequenced genome of *Lactiplantibacillus pentosus* 68-1 to those of selected strains.

**Table S4.** CAZy function classification of the selected *Lactiplantibacillus pentosus* strains.

**Table S5.** Acid and bile stress-related genes in the genome of *Lactiplantibacillus pentosus* 68-1.

**Table S6.** Adhesion-related genes in the genome of *Lactiplantibacillus pentosus* 68-1.

**Table S7.** Bacteriocin clusters predicted in *Lactiplantibacillus pentosus* 68-1 using BAGEL 4.

**Table S8.** The virulence factors in the genome of *Lactiplantibacillus pentosus* 68-1.

**Table S9.** Antibiotic resistance genes in the genome of *Lactiplantibacillus pentosus* 68-1.

**Table S10.** Prophages predicted in *Lactiplantibacillus pentosus* 68-1 using PHASTER

**Table S11.** Genomic islands predicted in *Lactiplantibacillus pentosus* 68-1 using IslandViewer 4.

**Table S12.** Insertion elements (IS) predicted in *Lactiplantibacillus pentosus* 68-1 using ISfinder.

**Table S13.** CPISPR/*cas* predicted in *Lactiplantibacillus pentosus* 68-1 using CRISPRCasFinder.

**Table S1.** Genome information of the selected strains of *Lactiplantibacillus pentosus*.

| Strains                     | Source                             | Genome size <sup>1</sup> (Mb) | GC (%) | CDS (coding)(n) | Accession number <sup>2</sup> |
|-----------------------------|------------------------------------|-------------------------------|--------|-----------------|-------------------------------|
| <i>L. pentosus</i> DSM20314 | Type strain                        | 3.62                          | 46.4   | 3156            | NZ_CP032757.1                 |
| <i>L. pentosus</i> BGM48    | Olive fermentation                 | 3.59                          | 46.3   | 3152            | NZ_CP016491.1                 |
| <i>L. pentosus</i> ZFM222   | Fermented vegetables               | 3.56                          | 46.4   | 3077            | NZ_CP032654.1                 |
| <i>L. pentosus</i> ZFM94    | Healthy Infant feces               | 3.56                          | 46.4   | 3066            | NZ_CP032659.1                 |
| <i>L. pentosus</i> SLC13    | Mustard pickles                    | 3.52                          | 46.5   | 3027            | NZ_CP022130.1                 |
| <i>L. pentosus</i> MS031    | Pickle                             | 3.58                          | 46.5   | 3097            | NZ_CP043671.1                 |
| <i>L. pentosus</i> KZ0310   | Pickle                             | 3.58                          | 46.5   | 3095            | NZ_CP044245.1                 |
| <i>L. pentosus</i> KCA1     | Vagina of a healthy Nigerian woman | 3.43                          | 46.4   | 2964            | NZ_CM001538.1                 |

Note: <sup>1</sup> chromosome sequence length; <sup>2</sup> NCBI accession number (GenBank).

**Table S2.** EggNOG category distribution of functional annotation results of *Lactiplantibacillus pentosus* 68-1 chromosome.

| COG categories | Categories function                                           | ORF number | Percentage (%) |
|----------------|---------------------------------------------------------------|------------|----------------|
| A              | RNA processing and modification                               | 0          | 0              |
| B              | Chromatin structure and dynamics                              | 1          | 0.0321         |
| C              | Energy production and conversion                              | 120        | 3.8536         |
| D              | Cell cycle control, cell division, chromosome partitioning    | 24         | 0.7707         |
| E              | Amino acid transport and metabolism                           | 209        | 6.7116         |
| F              | Nucleotide transport and metabolism                           | 84         | 2.6975         |
| G              | Carbohydrate transport and metabolism                         | 273        | 8.7669         |
| H              | Coenzyme transport and metabolism                             | 81         | 2.6012         |
| I              | Lipid transport and metabolism                                | 64         | 2.0552         |
| J              | Translation, ribosomal structure and biogenesis               | 149        | 4.7848         |
| K              | Transcription                                                 | 261        | 8.3815         |
| L              | Replication, recombination and repair                         | 163        | 5.2344         |
| M              | Cell wall/membrane/envelope biogenesis                        | 179        | 5.7482         |
| N              | Cell motility                                                 | 0          | 0              |
| O              | Posttranslational modification, protein turnover, chaperones  | 68         | 2.1837         |
| P              | Inorganic ion transport and metabolism                        | 137        | 4.3995         |
| Q              | Secondary metabolites biosynthesis, transport and catabolism  | 22         | 0.7065         |
| R              | General function prediction only                              | 0          | 0              |
| S              | Function unknown                                              | 631        | 20.2633        |
| T              | Signal transduction mechanisms                                | 81         | 2.6012         |
| U              | Intracellular trafficking, secretion, and vesicular transport | 20         | 0.6423         |
| V              | Defense mechanisms                                            | 64         | 2.0552         |
| W              | Extracellular structures                                      | 0          | 0              |
| Y              | Nuclear structure                                             | 0          | 0              |
| Z              | Cytoskeleton                                                  | 0          | 0              |
| -              | Not in eggNOG                                                 | 483        | 15.5106        |
| Total          | -                                                             | 3114       | 100            |

**Table S3.** Relatedness of the sequenced genomes of the *Lactiplantibacillus pentosus* 68-1 to those of reference strains

| Strains                     | ANIb   | ANIm   | TETRA   | GGDC <sup>1</sup> |
|-----------------------------|--------|--------|---------|-------------------|
| 68-1                        | 100.00 | 100.00 | 1.00000 | 100.0             |
| <i>L. pentosus</i> KZ0310   | 97.52  | 98.02  | 0.99903 | 81.5              |
| <i>L. pentosus</i> MS031    | 97.52  | 98.02  | 0.99903 | 81.5              |
| <i>L. pentosus</i> DSM20314 | 97.46  | 97.94  | 0.99897 | 80.9              |
| <i>L. pentosus</i> ZFM222   | 97.41  | 97.96  | 0.99875 | 80.4              |
| <i>L. pentosus</i> ZFM94    | 97.41  | 97.96  | 0.99875 | 80.4              |
| <i>L. pentosus</i> SLC13    | 97.29  | 97.93  | 0.99847 | 80.0              |
| <i>L. pentosus</i> BGM48    | 96.90  | 97.54  | 0.99839 | 77.6              |
| <i>L. pentosus</i> KCA1     | 92.41  | 93.36  | 0.99757 | 50.4              |

Note: <sup>1</sup> the GGDC results were based on the recommended formula 2.

**Table S4.** CAZy function classification of the selected *Lactiplantibacillus pentosus* strains

| Strains                     | GT | PL | CE | AA | CBM | GH | total |
|-----------------------------|----|----|----|----|-----|----|-------|
| <i>L. pentosus</i> 68-1     | 37 | 0  | 26 | 7  | 9   | 54 | 133   |
| <i>L. pentosus</i> DSM20314 | 38 | 0  | 1  | 0  | 16  | 56 | 111   |
| <i>L. pentosus</i> ZFM94    | 41 | 0  | 1  | 0  | 16  | 57 | 115   |
| <i>L. pentosus</i> SLC13    | 35 | 2  | 2  | 0  | 15  | 60 | 114   |
| <i>L. pentosus</i> BGM48    | 35 | 0  | 1  | 0  | 16  | 56 | 108   |
| <i>L. pentosus</i> IG1      | 34 | 0  | 1  | 0  | 9   | 47 | 91    |
| <i>L. pentosus</i> MP-10    | 33 | 0  | 1  | 0  | 6   | 52 | 92    |

Note: GT, glycosyltransferase; GH, glycoside hydrolase; AA, enzymes for auxiliary activities; CBM, carbohydrate binding module; CE, carbohydrate esterase; PL, polysaccharide lyase.

**Table S5.** Acid and bile stress-related genes in the genome of *Lactiplantibacillus pentosus* 68-1.

| Gene ID                        | Gene name         | Annotation                                                                  |
|--------------------------------|-------------------|-----------------------------------------------------------------------------|
| <b>General stress response</b> |                   |                                                                             |
| chr_1808                       | <i>dnaK</i>       | Molecular chaperone DnaK                                                    |
| chr_1807                       | <i>dnaJ</i>       | Molecular chaperone DnaJ                                                    |
| chr_1809                       | <i>grpE</i>       | Molecular chaperone GrpE                                                    |
| chr_1810                       | <i>hrcA</i>       | Heat-inducible transcriptional repressor HrcA                               |
| chr_659                        | <i>groES</i>      | Chaperonin GroES                                                            |
| chr_660                        | <i>groEL</i>      | Chaperonin GroEL                                                            |
| chr_118                        | <i>hsp20</i>      | Hsp20/alpha crystallin family protein                                       |
| chr_2861                       | <i>hsp20</i>      | Hsp20/alpha crystallin family protein                                       |
| chr_2327                       | <i>hsp20</i>      | Hsp20/alpha crystallin family protein                                       |
| chr_499                        | <i>hslO</i>       | Hsp33 family molecular chaperone HslO                                       |
| chr_1664                       | <i>hslU</i>       | ATP-dependent protease ATPase subunit HslU                                  |
| chr_498                        | <i>ftsH, hflB</i> | Cell division protease FtsH                                                 |
| chr_35                         | <i>degP, htrA</i> | Serine protease Do                                                          |
| chr_559                        | <i>clpP</i>       | ATP-dependent Clp protease, protease subunit ClpP(EC:3.4.21.92)             |
| chr_717                        | <i>clpP</i>       | ATP-dependent Clp endopeptidase proteolytic subunit ClpP (EC:3.4.21.92)     |
| chr_913                        | <i>clpC</i>       | ATP-dependent Clp protease, protease subunit ClpC (EC:3.4.21.92)            |
| chr_1148                       | <i>clpL</i>       | ATP-dependent Clp protease, protease subunit ClpL (EC:3.4.21.92)            |
| chr_1902                       | <i>clpX</i>       | ATP-dependent Clp protease ATP-binding subunit ClpX                         |
| chr_1709                       | <i>clpB</i>       | ATP-dependent chaperone ClpB                                                |
| chr_1038                       | <i>cspA</i>       | Cold shock protein                                                          |
| chr_28                         | <i>cspA</i>       | Cold shock protein                                                          |
| chr_899                        | <i>cspC</i>       | Cold shock protein                                                          |
| chr_844                        | <i>amaP</i>       | Alkaline shock response membrane anchor protein                             |
| chr_846                        | <i>asp23</i>      | Alkaline shock protein                                                      |
| chr_847                        | <i>asp23</i>      | Alkaline shock protein                                                      |
| chr_1439                       | <i>gls24</i>      | Alkaline shock protein                                                      |
| chr_819                        | <i>mutT</i>       | 8-oxo-dGTP diphosphatase, GrpB family protein                               |
| <b>pH tolerance</b>            |                   |                                                                             |
| chr_2125                       | <i>atpC</i>       | F-type H <sup>+</sup> /Na <sup>+</sup> -transporting ATPase subunit epsilon |
| chr_2126                       | <i>atpD</i>       | F-type H <sup>+</sup> /Na <sup>+</sup> -transporting ATPase subunit beta    |
| chr_2127                       | <i>atpG</i>       | F-type H <sup>+</sup> /Na <sup>+</sup> -transporting ATPase subunit gamma   |
| chr_2128                       | <i>atpA</i>       | F-type H <sup>+</sup> /Na <sup>+</sup> -transporting ATPase subunit alpha   |

|                       |               |                                                                           |
|-----------------------|---------------|---------------------------------------------------------------------------|
| chr_2129              | <i>atpH</i>   | F-type H <sup>+</sup> /Na <sup>+</sup> -transporting ATPase subunit delta |
| chr_2130              | <i>atpF</i>   | F-type H <sup>+</sup> /Na <sup>+</sup> -transporting ATPase subunit b     |
| chr_2131              | <i>atpE</i>   | F-type H <sup>+</sup> /Na <sup>+</sup> -transporting ATPase subunit c     |
| chr_2132              | <i>atpB</i>   | F-type H <sup>+</sup> /Na <sup>+</sup> -transporting ATPase subunit a     |
| chr_170               | <i>nhaC</i>   | Na <sup>+</sup> /H <sup>+</sup> antiporter, NhaC family                   |
| chr_366               | -             | Na <sup>+</sup> /H <sup>+</sup> antiporter                                |
| chr_748               | -             | Na <sup>+</sup> /H <sup>+</sup> antiporter                                |
| chr_818               | -             | Na <sup>+</sup> /H <sup>+</sup> antiporter, CPA2 family                   |
| chr_2273              | -             | Na <sup>+</sup> /H <sup>+</sup> antiporter                                |
| chr_2331              | -             | Na <sup>+</sup> /H <sup>+</sup> antiporter                                |
| chr_2389              | -             | Na <sup>+</sup> /H <sup>+</sup> antiporter                                |
| chr_2465              | -             | Na <sup>+</sup> /H <sup>+</sup> antiporter                                |
| chr_2848              | <i>nhaC</i> ; | Na <sup>+</sup> /H <sup>+</sup> antiporter, NhaC family                   |
| chr_3027              | -             | Na <sup>+</sup> /H <sup>+</sup> antiporter                                |
| chr_339               | <i>ldh</i>    | L-lactate dehydrogenase                                                   |
| chr_489               | <i>ldh</i>    | L-lactate dehydrogenase                                                   |
| chr_987               | <i>mdh</i>    | Malate dehydrogenase; L-lactate dehydrogenase                             |
| chr_1128              | -             | L-lactate dehydrogenase                                                   |
| chr_1839              | <i>ldhA</i>   | D-lactate dehydrogenase                                                   |
| chr_2114              | -             | L-lactate dehydrogenase                                                   |
| <b>bile tolerance</b> |               |                                                                           |
| chr_55                | -             | Choloylglycine hydrolase family protein; bile salt hydrolase              |
| chr_2245              | -             | Linear amide C-N hydrolase ; choloylglycine hydrolase                     |
| chr_2869              | -             | Choloylglycine hydrolase family protein ;bile salt hydrolase              |
| chr_59                | -             | MFS transporter; multidrug-effluxtransporter                              |
| chr_71                | <i>mepA</i> ; | MATE family efflux transporter                                            |
| chr_814               | <i>sugE</i> ; | SMR transporter, SugE                                                     |
| chr_2803              | <i>ebrB</i>   | SMR transporter, EbrB                                                     |
| chr_2804              | -             | SMR transporter, QacE family                                              |
| chr_701               | <i>blt</i> ;  | MFS transporter, DHA1 family, multidrug resistance protein                |
| chr_767               | -             | MFS transporter, DHA2 family                                              |
| chr_895               | -             | MFS transporter; DHA2 family                                              |
| chr_1113              | -             | MFS transporter                                                           |
| chr_1591              | <i>yebQ</i> ; | MFS transporter, DHA2 family                                              |
| chr_1736              | -             | MFS transporter, DHA2 family, EmrB/QacA subfamily                         |
| chr_2332              | -             | MFS transporter                                                           |
| chr_2470              | <i>mdeA</i> ; | MFS transporter, DHA2 family                                              |

|          |                               |                                                                   |
|----------|-------------------------------|-------------------------------------------------------------------|
| chr_2696 | -                             | MFS transporter, DHA2 family                                      |
| chr_2827 | -                             | MFS transporter; multidrug transport protein, EmrB/QacA subfamily |
| chr_182  | -                             | ABC transporter, subfamily C, bacterial;                          |
| chr_1682 | <i>uup</i> ;                  | ABC transporter                                                   |
| chr_1765 | <i>ytrB</i> ;                 | ABC transporter                                                   |
| chr_2149 | <i>efrB</i> ;                 | ABC transporter , subfamily B                                     |
| chr_2150 | <i>efrA</i> ;                 | ABC transporter , subfamily B                                     |
| chr_2167 | -                             | ABC transporter, subfamily C, bacterial;                          |
| chr_2240 | -                             | ABC transporter, subfamily C (CFTR/MRP), member 1;                |
| chr_2386 | -                             | ABC transporter                                                   |
| chr_2524 | <i>mdlB, smdB</i> ;           | ABC transporter,                                                  |
| chr_2525 | <i>mdlA, smdA</i> ;           | ABC transporter, subfamily B                                      |
| chr_2585 | <i>abcA, bmrA</i> ;           | ABC transporter                                                   |
| chr_2640 | <i>patA, rscA, lmrC, satA</i> | ABC transporter , subfamily B                                     |
| chr_3080 | <i>mdlA, smdA</i>             | ABC transporter, subfamily B, bacterial<br>AbcA/BmrA;             |
| chr_3081 | <i>mdlB, smdB</i> ;           | ABC transporter, subfamily B, bacterial<br>AbcA/BmrA;             |

---



**Table S6.** Adhesion-related genes in the genome of *Lactiplantibacillus pentosus* 68-1.

| Gene ID  | Gene name         | Annotation                                                |
|----------|-------------------|-----------------------------------------------------------|
| chr_1136 | -                 | Muc BP domain-containing protein                          |
| chr_1481 | -                 | Muc BP domain-containing protein                          |
| chr_2159 | -                 | Muc BP domain-containing protein                          |
| chr_2252 | -                 | Collagen-binding protein,                                 |
| chr_186  | -                 | Fibronectin-binding protein                               |
| chr_1622 | -                 | Fibronectin-binding protein                               |
| chr_980  | <i>psaA, scaA</i> | Manganese/zinc transport system substrate-binding protein |
| chr_2818 | -                 | Manganese/zinc transport system substrate-binding protein |
| chr_1377 | <i>pgaC, icaA</i> | Poly- $\beta$ -1,6-N-acetyl-D-glucosamine synthase        |
| chr_1424 | <i>glnA</i>       | Glutamine synthetase                                      |
| chr_2172 | <i>pgi</i>        | Glucose-6-phosphate isomerase                             |
| chr_267  | <i>gapA</i>       | Glyceraldehyde 3-phosphate dehydrogenase (EC:1.2.1.12)    |
| chr_722  | <i>gapA</i>       | Glyceraldehyde 3-phosphate dehydrogenase (EC:1.2.1.13)    |
| chr_725  | <i>eno</i>        | Phosphopyruvate dydrolase;enolase (EC:4.2.1.11)           |
| chr_1904 | <i>tuf</i>        | Elongation factor Tu,                                     |
| chr_724  | <i>tpiA</i>       | Triosephosphate isomerase                                 |
| chr_462  | <i>srtA</i>       | Sortase A (EC:3.4.22.70)                                  |
| chr_723  | <i>pgk</i>        | Phosphoglycerate kinase                                   |
| chr_817  | <i>gpmB</i>       | Probable phosphoglycerate mutase                          |
| chr_2431 | <i>gpmB</i>       | Probable phosphoglycerate mutase                          |
| chr_2706 | <i>gpmA</i>       | 2,3-bisphosphoglycerate-dependent phosphoglycerate mutase |
| chr_660  | <i>groEL</i>      | Chaperonin GroEL                                          |
| chr_659  | <i>groES</i>      | Chaperonin GroES                                          |
| chr_1808 | <i>dnaK</i>       | Molecular chaperone DnaK                                  |
| chr_1807 | <i>dnaJ</i>       | Molecular chaperone DnaJ                                  |

**Table S7.** Bacteriocin clusters predicted in *Lactiplantibacillus pentosus* 68-1 using BAGEL 4 (<http://bagel.molgenrug.nl/>).

| AOI                 | Start   | End     | Class                |
|---------------------|---------|---------|----------------------|
| <b>Chr.0.AOI.01</b> | 3233207 | 3253507 | 159.2; Pediocin      |
| <b>Chr.0.AOI.02</b> | 408608  | 428956  | 171.2; Plantaricin_F |

**Table S8.** The virulence factors in the genome of *Lactiplantibacillus pentosus* 68-1.

| VFDB ID        | Gene ID  | VFDB name | VFDB name    | Annotation                                |
|----------------|----------|-----------|--------------|-------------------------------------------|
| VFG000964      |          |           | Hyaluronic   | MULTISPECIES:<br>UTP--glucose-1-phosphate |
| (gb NP_270109) | chr_684  | VF0244    | acid capsule | uridylyltransferase GalU;                 |
| VFG000077      |          |           |              | MULTISPECIES: ATP-dependent Clp           |
| (gb NP_465991) | chr_717  | VF0074    | ClpP         | endopeptidase proteolytic subunit ClpP    |
| VFG002182      |          |           |              |                                           |
| (gb NP_816133) | chr_1057 | VF0361    | Capsule      | UDP-galactopyranose mutase                |
| VFG001967      |          |           |              |                                           |
| (gb NP_282580) | chr_1057 | VF0323    | Capsule      | UDP-galactopyranose mutase                |
| VFG001347      |          |           |              | UDP-N-acetylglucosamine--LPS              |
| (gb NP_688179) | chr_1062 | VF0274    | Capsule      | N-acetylglucosamine transferase           |
| VFG002182      |          |           |              |                                           |
| (gb NP_816133) | chr_1105 | VF0361    | Capsule      | UDP-galactopyranose mutase                |
| VFG000080      |          |           |              | ATP-dependent Clp protease,               |
| (gb NP_464522) | chr_1148 | VF0073    | ClpL         | ATP-binding subunit ClpL                  |
|                |          |           |              | isoprenyl transferase; undecaprenyl       |
|                |          |           |              | pyrophosphate synthase (UPP               |
|                |          |           |              | synthase); ditrans,                       |
| VFG002190      |          |           |              | Polycis-undecaprenyl-diphosphate          |
| (gb NP_816141) | chr_1831 | VF0361    | Capsule      | synthase;                                 |

**Table S9.** Antibiotic resistance genes in the genome of *Lactiplantibacillus pentosus* 68-1.

| Gene ID  | Location        | Type                       | Gene name                    | Annotation                                                                                                          | KEGG-ID |
|----------|-----------------|----------------------------|------------------------------|---------------------------------------------------------------------------------------------------------------------|---------|
| chr_466  | 517531-518919   | vancomycin resistance      | <i>murF</i>                  | UDP-N-acetylmuramoyl-tripeptide--D-alanyl-D-alanine ligase                                                          | K01929  |
| chr_470  | 521906-523033   | vancomycin resistance      | <i>alr</i>                   | Alanine racemase                                                                                                    | K01775  |
| chr_700  | 769387-769944   | vancomycin resistance      | <i>vanX</i>                  | Zinc D-Ala-D-Ala dipeptidase                                                                                        | K08641  |
| chr_909  | 1011693-1012466 | vancomycin resistance      | <i>vanY</i>                  | Zinc D-Ala-D-Ala carboxypeptidase                                                                                   | K07260  |
| chr_1971 | 2193481-2194578 | vancomycin resistance      | <i>murG</i>                  | UDP-N-acetylglucosamine--N-acetylmuramyl-(pentapeptide) pyrophosphoryl-undecaprenol N-acetylglucosamine transferase | K02563  |
| chr_1973 | 2197095-2197955 | vancomycin resistance      | <i>mraY</i>                  | Phospho-N-acetylmuramoyl-pentapeptide-transferase                                                                   | K01000  |
| chr_2111 | 2352482-2353594 | vancomycin resistance      | <i>ddl</i>                   | D-alanine-D-alanine ligase                                                                                          | K01921  |
| chr_175  | 198424-200085   | $\beta$ -Lactam resistance | <i>oppA</i> ,<br><i>mppA</i> | Oligopeptide transport system substrate-binding protein                                                             | K15580  |
| chr_176  | 200835-202496   | $\beta$ -Lactam resistance | <i>oppA</i> ,<br><i>mppA</i> | Oligopeptide transport system substrate-binding protein                                                             | K15580  |
| chr_391  | 434363-435853   | $\beta$ -Lactam resistance | <i>oppB</i>                  | Oligopeptide transport system permease protein                                                                      | K15581  |
| chr_392  | 435855-436793   | $\beta$ -Lactam resistance | <i>oppC</i>                  | Oligopeptide transport system permease protein                                                                      | K15582  |
| chr_393  | 436807-437895   | $\beta$ -Lactam resistance | <i>oppD</i>                  | Oligopeptide transport system ATP-binding protein                                                                   | K15583  |
| chr_394  | 437903-438823   | $\beta$ -Lactam resistance | <i>oppF</i>                  | Oligopeptide transport system ATP-binding protein                                                                   | K10823  |
| chr_437  | 481766-482593   | $\beta$ -Lactam resistance | <i>penP</i>                  | $\beta$ -lactamase class A                                                                                          | K17836  |
| chr_715  | 786856-788508   | $\beta$ -Lactam resistance | <i>oppA</i> ,<br><i>mppA</i> | Oligopeptide transport system substrate-binding protein                                                             | K15580  |
| chr_914  | 1020930-1021553 | $\beta$ -Lactam resistance | <i>nalD</i>                  | TetR/AcrR family transcriptional regulator, repressor of the <i>mexAB-oprM</i> multidrug resistance operon          | K18135  |
| chr_1140 | 1261008-1262654 | $\beta$ -Lactam resistance | <i>oppA</i> ,<br><i>mppA</i> | Oligopeptide transport system substrate-binding protein                                                             | K15580  |

|          |                 |                            |                            |                                                         |        |
|----------|-----------------|----------------------------|----------------------------|---------------------------------------------------------|--------|
| chr_1141 | 1262846-1263742 | $\beta$ -Lactam resistance | <i>oppB</i>                | Oligopeptide transport system permease protein          | K15581 |
| chr_1142 | 1263746-1264780 | $\beta$ -Lactam resistance | <i>oppC</i>                | Oligopeptide transport system permease protein          | K15582 |
| chr_1143 | 1264796-1265875 | $\beta$ -Lactam resistance | <i>oppD</i>                | Oligopeptide transport system ATP-binding protein       | K15583 |
| chr_1144 | 1265882-1266847 | $\beta$ -Lactam resistance | <i>oppF</i>                | Oligopeptide transport system ATP-binding protein       | K10823 |
| chr_1254 | 1421886-1424015 | $\beta$ -Lactam resistance | <i>pbp2A</i>               | Penicillin-binding protein 2A                           | K12555 |
| chr_1413 | 1598981-1601017 | $\beta$ -Lactam resistance | <i>pbp2B</i> , <i>penA</i> | Penicillin-binding protein 2B                           | K00687 |
| chr_1584 | 1778260-1780566 | $\beta$ -Lactam resistance | <i>mrcA</i>                | Penicillin-binding protein 1A                           | K05366 |
| chr_2585 | 2884988-2886745 | $\beta$ -Lactam resistance | <i>abcA</i> , <i>bmrA</i>  | ATP-binding cassette, subfamily B, bacterial AbcA/BmrA  | K18104 |
| chr_2788 | 3103723-3104688 | $\beta$ -Lactam resistance | <i>oppC</i>                | Oligopeptide transport system permease protein          | K15582 |
| chr_2789 | 3104690-3106180 | $\beta$ -Lactam resistance | <i>oppB</i>                | Oligopeptide transport system permease protein          | K15581 |
| chr_2790 | 3106283-3108250 | $\beta$ -Lactam resistance | <i>oppA</i> , <i>mppA</i>  | Oligopeptide transport system substrate-binding protein | K15580 |
| chr_2965 | 3300433-3302136 | $\beta$ -Lactam resistance | <i>nagZ</i>                | $\beta$ -N-acetylhexosaminidase                         | K01207 |
| chr_35   | 46716-47978     | CAMP resistance            | <i>degP</i> , <i>htrA</i>  | Serine protease Do                                      | K04771 |
| chr_625  | 687105-689708   | CAMP resistance            | <i>mprF</i> , <i>fmtC</i>  | Phosphatidylglycerol lysyltransferase                   | K14205 |
| chr_1248 | 1415836-1416072 | CAMP resistance            | <i>dltC</i>                | D-alanine-poly (phosphoribitol) ligase subunit 2        | K14188 |
| chr_1787 | 2000156-2001004 | CAMP resistance            | <i>amiAB</i> , <i>C</i>    | N-acetylmuramoyl-L-alanine amidase                      | K01448 |
| chr_1801 | 2015245-2016522 | CAMP resistance            | <i>dltD</i>                | D-alanine transfer protein                              | K03740 |
| chr_1803 | 2016786-2018000 | CAMP resistance            | <i>dltB</i>                | Membrane protein involved in D-alanine                  | K03739 |
| chr_1804 | 2017997-2019523 | CAMP resistance            | <i>dltA</i>                | D-alanine-poly (phosphoribitol) ligase subunit 1        | K03367 |
| chr_191  | 218234-219754   | macrolide resistance       | <i>msrA</i> , <i>vmlR</i>  | Macrolide transport system ATP-binding/permease protein | K18231 |
| chr_1616 | 1813578-1814246 | phenicol resistance        | <i>catA</i>                | Chloramphenicol O-acetyltransferase type A              | K19271 |

|          |                 |                               |                                                                 |                                               |        |
|----------|-----------------|-------------------------------|-----------------------------------------------------------------|-----------------------------------------------|--------|
| chr_2514 | 2798293-2798862 | phenicol<br>resistance        | <i>catB</i>                                                     | Chloramphenicol<br>O-acetyltransferase type B | K00638 |
| chr_2639 | 2940150-2941820 | fluoroquinolone<br>resistance | <i>patB</i> ,<br><i>rscB</i> ,<br><i>lmrC</i> ,<br><i>satB</i>  | ATP-binding cassette, subfamily<br>B          | K18892 |
| chr_2640 | 2941924-2943648 | fluoroquinolone<br>resistance | <i>pataA</i> ,<br><i>rscA</i> ,<br><i>lmrC</i> ,<br><i>satA</i> | ATP-binding cassette, subfamily<br>B          | K18891 |
| chr_71   | 84923-86251     | multidrug<br>resistance       | <i>mepA</i>                                                     | Multidrug efflux pump                         | K18908 |
| chr_701  | 770376-770768   | multidrug<br>resistance       | <i>blt</i>                                                      | MFS transporter, DHA1 family                  | K08153 |
| chr_1591 | 1784549-1785940 | multidrug<br>resistance       | <i>yebQ</i>                                                     | MFS transporter, DHA2 family                  | K08169 |
| chr_2149 | 2393929-2395815 | multidrug<br>resistance       | <i>efrB</i>                                                     | ATP-binding cassette, subfamily<br>B          | K18888 |
| chr_2150 | 2395815-2397545 | multidrug<br>resistance       | <i>efrA</i>                                                     | ATP-binding cassette, subfamily<br>B          | K18887 |
| chr_2239 | 2487157-2488887 | multidrug<br>resistance       | <i>efrB</i>                                                     | ATP-binding cassette, subfamily<br>B          | K18888 |
| chr_2470 | 2757441-2758925 | multidrug<br>resistance       | <i>mdeA</i>                                                     | MFS transporter, DHA2 family                  | K18936 |
| chr_2524 | 2807784-2809571 | multidrug<br>resistance       | <i>mdlB</i> ,<br><i>smdB</i>                                    | ATP-binding cassette, subfamily<br>B          | K18890 |
| chr_2525 | 2809571-2811322 | multidrug<br>resistance       | <i>mdlA</i> ,<br><i>smdA</i>                                    | ATP-binding cassette, subfamily<br>B          | K18889 |
| chr_2803 | 3122567-3122947 | multidrug<br>resistance       | <i>ebrB</i>                                                     | Multidrug resistance protein<br>EbrB          | K11815 |
| chr_2880 | 3204764-3205987 | multidrug<br>resistance       | <i>mdtG</i>                                                     | MFS transporter, DHA1 family                  | K08161 |
| chr_3080 | 3438308-3440065 | multidrug<br>resistance       | <i>mdlA</i> ,<br><i>smdA</i>                                    | ATP-binding cassette, subfamily<br>B,         | K18889 |
| chr_3081 | 3440094-3441848 | multidrug<br>resistance       | <i>mdlB</i> ,<br><i>smdB</i>                                    | ATP-binding cassette, subfamily<br>B          | K18890 |

---

**Table S10.** Prophages predicted in *Lactiplantibacillus pentosus* 68-1 using PHASTER (<https://www.phaster.ca>).

| Region        | Region length | Completeness | Score | Total CDS | Region position | GC (%) | Most common phage                       |
|---------------|---------------|--------------|-------|-----------|-----------------|--------|-----------------------------------------|
| 1 (chr)       | 44kb          | Intact       | 130   | 57        | 595926-639955   | 41.00  | PHAGE_Lactob_Sha1_NC_019489(18)         |
| 1 (plasmid 3) | 24.1kb        | Questionable | 80    | 19        | 530-24700       | 41.02  | PHAGE_Erwini_pEp_SNUABM_01_NC_048807(3) |

**Table S11.** Genomic islands predicted in *Lactiplantibacillus pentosus* 68-1 using IslandViewer 4.

| Island start | Island end | Length |
|--------------|------------|--------|
| 295427       | 302887     | 7460   |
| 301719       | 306260     | 4541   |
| 596092       | 641079     | 44987  |
| 596092       | 606321     | 10229  |
| 610801       | 615613     | 4812   |
| 617466       | 628011     | 10545  |
| 678718       | 683402     | 4684   |
| 679244       | 684077     | 4833   |
| 795127       | 799663     | 4536   |
| 1021882      | 1029071    | 7189   |
| 1030342      | 1049100    | 18758  |
| 1175589      | 1182221    | 6632   |
| 1176250      | 1195017    | 18767  |
| 1473219      | 1480049    | 6830   |
| 2060800      | 2066116    | 5316   |
| 2071319      | 2076126    | 4807   |
| 2075836      | 2082981    | 7145   |
| 2332490      | 2339115    | 6625   |
| 2403802      | 2408618    | 4816   |
| 2861956      | 2866959    | 5003   |
| 3294231      | 3307826    | 13595  |
| 3345618      | 3352381    | 6763   |
| 3355993      | 3360377    | 4384   |
| 3405411      | 3411748    | 6337   |

Note: predicted by at least one method.



**Table S12.** Insertion elements (IS) predicted in *Lactiplantibacillus pentosus* 68-1 using ISfinder (<https://www-is.biotoul.fr>).

| Sequences<br>producing<br>significant<br>alignments | IS Family   | Group   | Origin                                        | Score<br>(bits) | E. value |
|-----------------------------------------------------|-------------|---------|-----------------------------------------------|-----------------|----------|
| ISP1                                                | ISL3        |         | <i>Lactiplantibacillus plantarum</i>          | 2531            | 0.0      |
| ISLpl3                                              | IS5         | IS427   | <i>Lactiplantibacillus plantarum</i>          | 1362            | 0.0      |
| ISP2                                                | IS1182      |         | <i>Lactiplantibacillus plantarum</i>          | 63.9            | 2e-06    |
| ISLho3                                              | IS4         | ISPepr1 | <i>LPaucilactobacillus<br/>hokkaidonensis</i> | 63.9            | 2e-06    |
| ISLpl2                                              | IS3         | IS150   | <i>Lactiplantibacillus plantarum</i>          | 56.0            | 4e-04    |
| SLhe65                                              | IS200/IS605 | IS1341  | <i>Lactobacillus helveticus</i>               | 54.0            | 0.002    |

Note: searching parameters: word size 11, E. value: 0.01, gap open existence:5 extension:2

**Table S13.** CPISPR/*cas* predicted in *Lactiplantibacillus pentosus* 68-1 using CRISPRCasFinder (<https://crisprcas.i2bc.paris-saclay.fr/>).

| Element     | CRISPR Id /Cas Type | Start   | End     | Spacer/ Gene | Repeat consensus/cas genes                                                                                  | Direction | Evidence Level |
|-------------|---------------------|---------|---------|--------------|-------------------------------------------------------------------------------------------------------------|-----------|----------------|
| Cas cluster | CAS-TypeII A        | 118227  | 124359  | 4            | cas9_TypeII,<br>cas1_TypeII,<br>cas2_TypeI-II-III,<br>csn2_TypeIIA<br>GTCTTGAATAGTA                         |           |                |
| CRISPR      | chr_1               | 124384  | 125079  | 10           | GTCATATCAAAC<br>AGGTTTAGAAC<br>GGATCACCCCCG                                                                 | +         | 4              |
| CRISPR      | chr_2               | 1293828 | 1294343 | 8            | CATACGCGGGGA<br>ACAG<br>GGATCACCCCCGT                                                                       | ND        | 4              |
| CRISPR      | chr_3               | 1546373 | 1546830 | 7            | ATACACGGGGAA<br>TAG                                                                                         | ND        | 4              |
| Cas cluster | CAS-TypeIE          | 1549098 | 1556661 | 6            | cas3_TypeI,<br>cse1_TypeIE,<br>cse2_TypeIE,<br>cas7_TypeIE,<br>cas5_TypeIE,<br>cas6_TypeIE<br>GTACTCCCCGTGT |           |                |
| CRISPR      | chr_4               | 1556831 | 1557224 | 6            | ATACGGGGGTGA<br>TCC                                                                                         | ND        | 4              |
| CRISPR      | chr_5               | 2814915 | 2815136 | 1            | AAGTTGTTGCACA<br>CCACTTACT                                                                                  | ND        | 1              |
